# Supplementary material
Source: publisher figshare collection journal article supplement (https://gsajournals.figshare.com/articles/dataset/_/10266425)
Supplement: Supplementary file 1 [file 1]

| Population | Signature strength | Total | True positives | False positives |
|------------|--------------------|-------|----------------|-----------------|
| GABI       | Strong             | 82    | 81             | 1               |
| GABI       | Weak               | 42    | 26             | 16              |
| IBM        | Strong             | 36    | 36             | 0               |
| IBM        | Weak               | 115   | 21             | 94              |
| WHEAT      | Strong             | 97    | 97             | 0               |
| WHEAT      | Weak               | 278   | 0              | 278             |

**Table S2. Assessment of rates of true and false positives by visual inspection**

Visual examination of all allele frequency profiles associated with the candidate markers allowed us to call each event as true or false. All but one event giving strong signatures were found to be true positives.
