# Supplementary material
Source: publisher figshare collection journal article supplement (https://gsajournals.figshare.com/articles/dataset/_/10266425)
Supplement: Supplementary file 6 [file 1]

1   **Supplementary File S6: Installation with Rstudio.**

2   For Rstudio users, with some versions of R and/or Rstudio it may be necessary to restart the R session  
3   just after installing the package (for instance by closing Rstudio and re-opening it) *before* launching the  
4   *library(CNVmap)* command. Otherwise, errors may be generated when trying to auto-complete the  
5   package name.

6
