# Supplementary material
Source: publisher figshare collection journal article supplement (https://gsajournals.figshare.com/articles/dataset/_/10266425)
Supplement: Supplementary file 7 [file 1]

| popName                               | GABI  | IBM   | WHEAT |
|---------------------------------------|-------|-------|-------|
| mappingPanelType                      | DH    | IRIL  | RIL   |
| parents                               | P1-P2 | P1-P2 | P1-P2 |
| nbSelfingGenerationsRils              | 6     | 6     | 6     |
| nbIntermatingGenerations              | 4     | 4     | 4     |
| nuGamma                               | 3     | 3     | 3     |
| maxPercentGenot                       | 90    | 90    | 90    |
| quantThresHetMend                     | 70    | 70    | 95    |
| quantThresMissMend                    | 70    | 70    | 95    |
| minMafMend                            | 0.15  | 0.05  | 0     |
| analyzeMarkersWithoutHetero           | TRUE  | TRUE  | TRUE  |
| quantThresHetCand                     | 93    | 93    | 93    |
| quantThresMissCand                    | 95    | 95    | 95    |
| minNbMrkPerTarget                     | 2     | 2     | 2     |
| maxGenDistToFusePeaks                 | 10    | 10    | 10    |
| winSizeToFitPeakShape                 | 40    | 40    | 40    |
| minSlopePeak                          | -0.05 | -0.05 | -0.05 |
| toleranceFreq                         | 0.05  | 0.05  | 0.05  |
| minR2peak                             | 0.7   | 0.7   | 0.7   |
| simulateProfiles                      | TRUE  | TRUE  | TRUE  |
| plotCNVstrong                         | TRUE  | TRUE  | TRUE  |
| plotCNVweak                           | TRUE  | TRUE  | TRUE  |
| plotUnclassified                      | TRUE  | TRUE  | TRUE  |
| plotSingleLocus                       | FALSE | FALSE | FALSE |
| Markers_Before_Filtering              | 13160 | 20913 | 83721 |
| Individuals_Before_Filtering          | 625   | 239   | 406   |
| Markers_Remaining_After_Filtering     | 12061 | 20824 | 83598 |
| Individuals_Remaining_After_Filtering | 625   | 239   | 406   |
| Max_Num_Indiv_H_for_Mend              | 0     | 3     | 16    |
| Max_Num_Indiv_M_for_Mend              | 2     | 3     | 9     |
| Min_Num_Indiv_H_for_Cand              | 6     | 9     | 15    |
| Min_Num_Indiv_M_for_Cand              | 86    | 9     | 9     |
| Candidate_Markers                     | 746   | 938   | 10754 |
| Mendelian_Markers                     | 10872 | 16420 | 72844 |
| Non-Mendelian_Non-Candidate_Markers   | 443   | 3466  | 0     |
| A/B                                   | 52    | 122   | 667   |
| A/B Ah                                | 44    | 0     | 1176  |
| A/B Am                                | 179   | 271   | 99    |
| A/B Bh                                | 44    | 0     | 784   |
| A/B Bm                                | 170   | 122   | 81    |
| A/B_A/-                               | 16    | 3     | 12    |
| A/B_A/- Hm                            | 1     | 10    | 0     |
| A/B_A/- HmHb                          | 7     | 30    | 68    |
| A/B_-/A                               | 21    | 0     | 3     |
| A/B_-/A Hm                            | 0     | 0     | 0     |
| A/B_-/A HmHb                          | 12    | 30    | 59    |
| A/B_B/-                               | 20    | 0     | 17    |
| A/B_B/- Hm                            | 0     | 0     | 0     |
| A/B_B/- HmHa                          | 14    | 23    | 80    |
| A/B_-/B                               | 19    | 14    | 15    |
| A/B_-/B Hm                            | 0     | 8     | 0     |
| A/B_-/B HmHa                          | 9     | 32    | 71    |
| A/B_-/A_-/A                           | 0     | 0     | 5     |
| A/B_A/-_A/-                           | 0     | 0     | 1     |
| A/B_-/B_-/B                           | 3     | 1     | 0     |
| A/B_B/-_B/-                           | 0     | 0     | 9     |
| A/B_-/A_A/-                           | 0     | 0     | 0     |
| A/B_A/-_A/-                           | 1     | 0     | 16    |

|             |     |     |      |
|-------------|-----|-----|------|
| A/B_-/A_-/B | 0   | 0   |      |
| A/B_-/B_-/A | 1   | 0   |      |
| A/B_-/A_B/- | 0   | 0   |      |
| A/B_B/-_-/A | 0   | 0   |      |
| A/B_A/-_-/B | 0   | 0   |      |
| A/B_-/B_A/- | 0   | 0   |      |
| A/B_A/-_B/- | 0   | 0   |      |
| A/B_B/-_A/- | 0   | 0   |      |
| A/B_-/B_B/- | 0   | 0   |      |
| A/B_B/-_-/B | 0   | 0   | 19   |
| No_profile  | 2   | 260 | 6163 |
| Unknown     | 131 | 12  | 1409 |

**Table S1. Detailed statistics of the three populations GABI, IBM, and WHEAT**

Data as provided in the file with suffix "\_CNV\_Stats" generated by the software. From top to bottom, the four sections (separated by horizontal lines) are: (1) characteristics of the populations analyzed, (2) parameters for data filtering and CNV detection. All lines of these two sections are the arguments of the function CNVdetect (descriptions of each parameter are available by typing "? CNVdetect" in R after installing and loading the package CMVmap), (3) numbers of markers and individuals before and after data filtering, and number of candidates considered by the software for CNV detection, based on their anomalously high number of heterozygote or missing data calls. Thresholds for these numbers are given as Max\_Num\_Indiv\_H\_for\_Cand and Max\_Num\_Indiv\_M\_for\_Cand, respectively. Markers having more than Max\_Num\_Indiv\_H\_for\_Mend heterozygote calls or more than Max\_Num\_Indiv\_M\_for\_Mend missing data calls were automatically removed from the analysis to improve quality of the profiles, and (4) number of events detected for each possible category. Each category is encoded as a string of 1 to 3 groups of 3 characters each, separated by an underscore. The first group is always encoded "A/B" and indicates the reference locus, located at the position where the candidate marker was initially mapped. Further groups indicate other copies of the region targeted by the candidate marker. For all groups (loci), the letters just before and just after the slash represent respectively the haplotypes of the first parent (alleles denoted "A"), and of the second parent (alleles denoted "B").
